# Supplementary material for: Elucidating the Molecular Mechanisms by which Seed-Borne Endophytic Fungi, Epichloë gansuensis, Increases the Tolerance of Achnatherum inebrians to NaCl Stress
Source: MDPI journal article supplement (doi:10.3390/ijms222413191), 2021-12-07
Supplement: s1 [file s1]

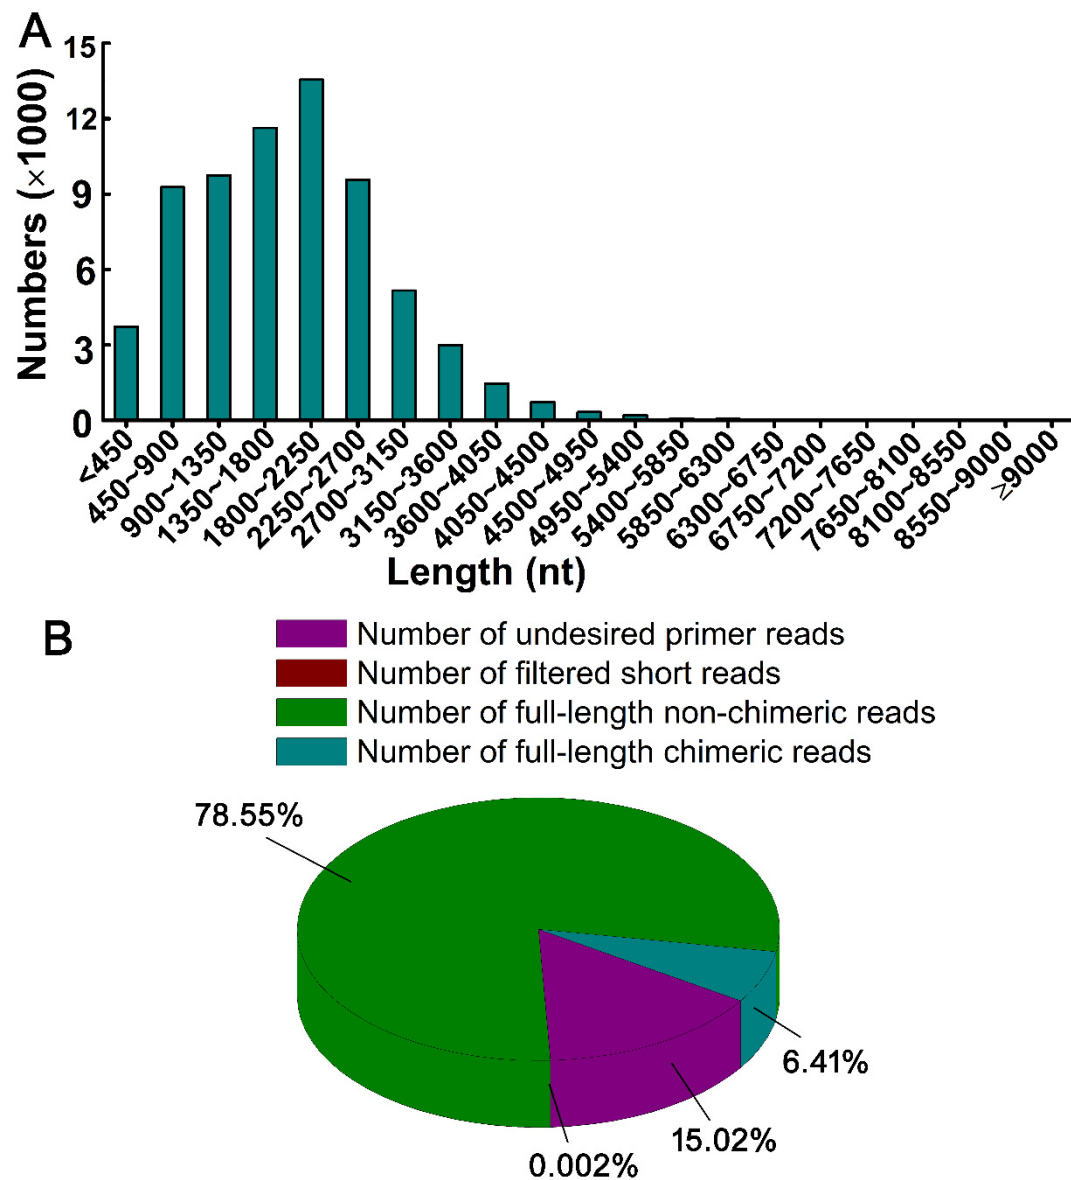

**Supplementary Figure S1.** The outline of PacBio RS II single-molecule real-time (SMRT) sequencing in *A. inebrians*. (A): The length distributions and numbers of 940,319 reads from PacBio libraries. (B): Proportion of different types of PacBio reads.

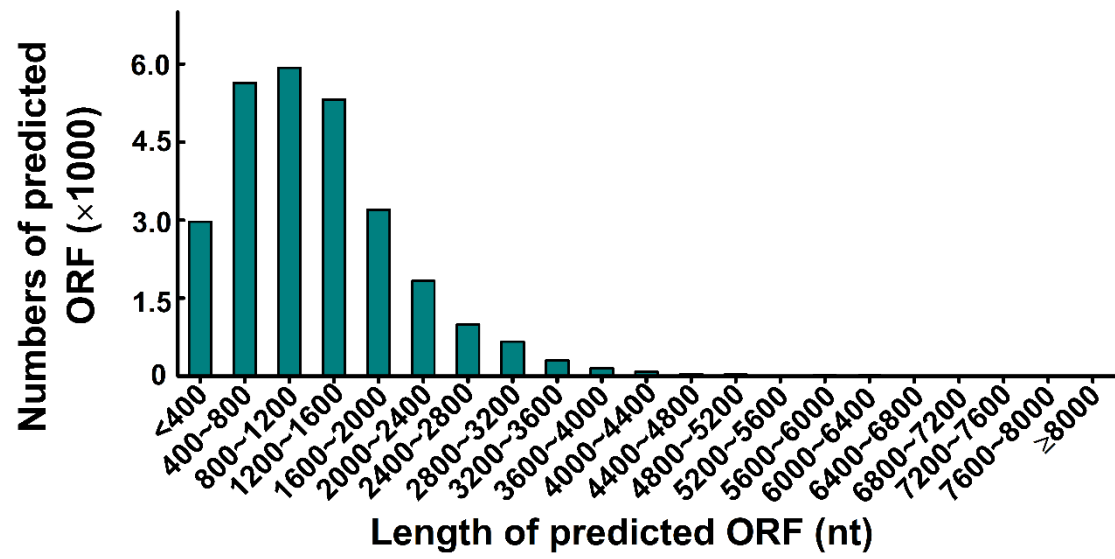

**Supplementary Figure S2.** The length distributions and numbers of open reading frame (ORF) of 36,105 non-redundant full-length transcripts in *A. inebrians*.

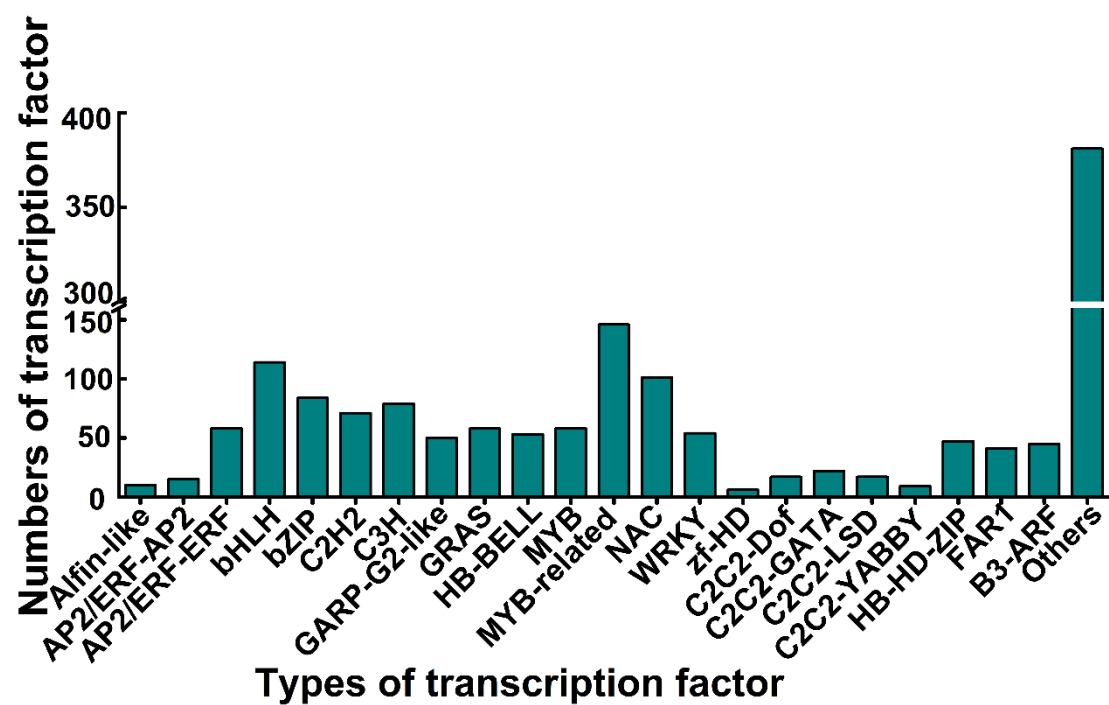

**Supplementary Figure S3.** The types and numbers of transcription factors of 36,105 non-redundant full-length transcripts in *A. iebricans*.

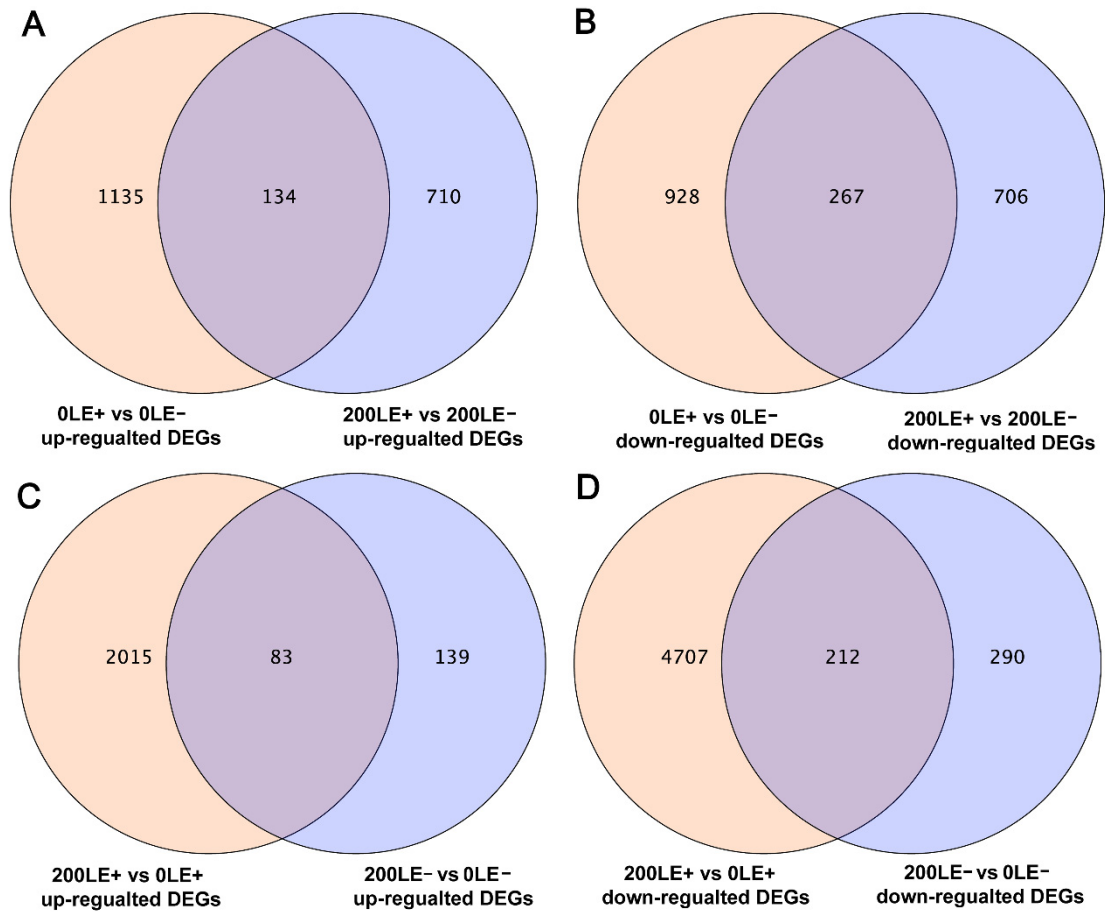

**Supplementary Figure S4.** Venn diagram demonstrating the non-overlapping and overlapping up- and down-regulated DEGs among the comparisons. (A): the up-regulated DEGs between (0LE+ vs 0LE-) and (200LE+ vs 200LE-); (B): the down-regulated DEGs between (0LE+ vs 0LE-) and (200LE+ vs 200LE-); (C): the up-regulated DEGs between (200LE+ vs 0LE+) and (200LE- vs 0LE-); (D) the down-regulated DEGs between (200LE+ vs 0LE+) and (200LE- vs 0LE-).

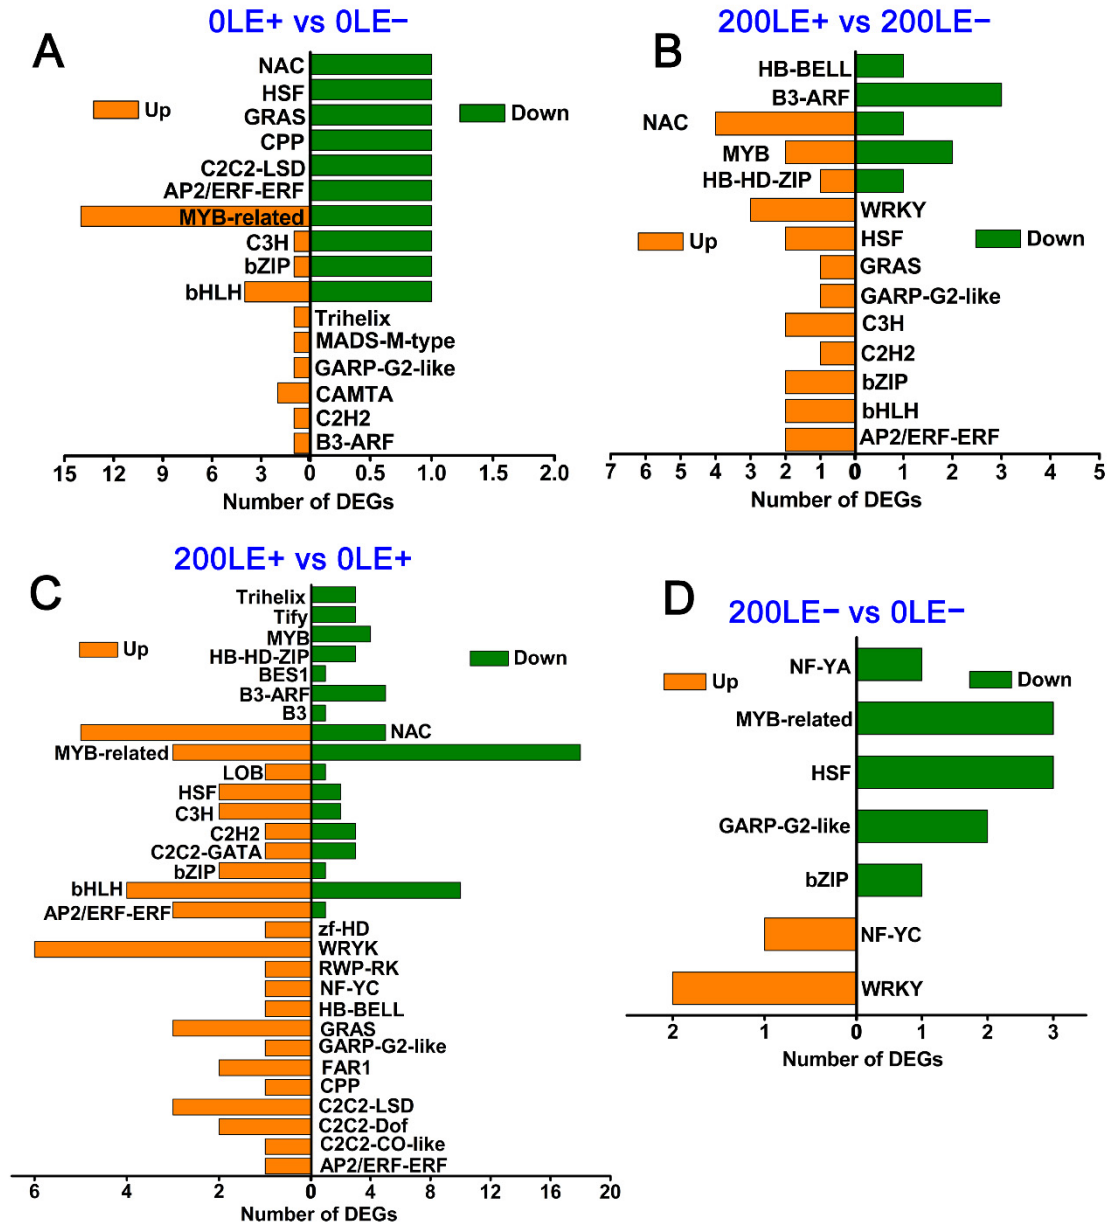

**Supplementary Figure S5.** The transcription factors of up- and down-regulated DEGs between 0LE+ vs 0LE- (A); between 200LE+ vs 200LE- (B); between 200LE+ vs 0LE+ (C); between 200LE- vs 0LE- (D).

**Supplementary Table S1.** Summary of PacBio-based RNA sequencing.

|                                           | <b>Number</b> |
|-------------------------------------------|---------------|
| Reads of insert of PacBio sequencing      | 940,319       |
| Bases of insert of PacBio sequencing (bp) | 1,789,709,871 |
| Number of undesired primer reads          | 141,272       |
| Number of filtered short reads            | 142           |
| Number of full-length non-chimeric reads  | 738,588       |
| Number of full-length chimeric reads      | 60,317        |
| Number of consensus isoforms              | 68,878        |
| Average consensus isoforms read length    | 1,832         |
| Number of polished high-quality isoforms  | 68,615        |
| Number of polished low-quality isoforms   | 224           |

**Supplementary Table S2.** Prediction of simple sequence repeats (SSRs) out of our transcript datasets.

|                                                | <b>Number</b> |
|------------------------------------------------|---------------|
| Total number of sequences examined             | 34702         |
| Total size of examined sequences (bp)          | 68475072      |
| Total number of identified SSRs                | 15945         |
| Number of SSR containing sequences             | 11653         |
| Number of sequences containing more than 1 SSR | 3185          |
| Number of SSRs present in compound formation   | 1664          |
| Mono-nucleotide                                | 3213          |
| Di-nucleotide                                  | 3700          |
| Tri-nucleotide                                 | 8493          |
| Tetra-nucleotide                               | 371           |
| Penta-nucleotide                               | 81            |
| Hexa-nucleotide                                | 87            |

**Supplementary Table S3.** Annotation of our transcript datasets to public databases. COG, clusters of orthologous groups; GO, gene ontology; KEGG, kyotoencyclopedia of genes and genomes; Pfam, a large collection of protein families; Swiss-Prot, a well-annotated and manually checked protein database; TrEMBL, an automatically annotated protein database; NR, a NCBI non-redundant protein database.

| Annotated databases | Isoform Number | Percentage |
|---------------------|----------------|------------|
| COG                 | 15188          | 42.07%     |
| GO                  | 29623          | 82.05%     |
| KEGG                | 14998          | 41.54%     |
| KOG                 | 20815          | 57.65%     |
| Pfam                | 28805          | 79.78%     |
| Swiss-Prot          | 24715          | 68.45%     |
| eggNOG              | 33376          | 92.44%     |
| NR                  | 33878          | 93.83%     |
| All                 | 33998          | 94.16%     |

**Supplementary Table S4.** The types and numbers of transcription factors

| TF types     | TF members |
|--------------|------------|
| Alfin-like   | 10         |
| AP2/ERF-AP2  | 15         |
| AP2/ERF-ERF  | 58         |
| B3           | 13         |
| B3-ARF       | 45         |
| BBR-BPC      | 6          |
| BES1         | 1          |
| bHLH         | 114        |
| bZIP         | 84         |
| C2C2-CO-like | 4          |
| C2C2-Dof     | 17         |
| C2C2-GATA    | 22         |
| C2C2-LSD     | 17         |
| C2C2-YABBY   | 9          |
| C2H2         | 71         |
| C3H          | 79         |
| CAMTA        | 10         |
| CPP          | 10         |
| CSD          | 1          |
| DBB          | 7          |
| DBP          | 10         |
| EIL          | 10         |
| FAR1         | 41         |
| GARP-ARR-B   | 6          |
| GARP-G2-like | 50         |
| GeBP         | 9          |
| GRAS         | 58         |
| GRF          | 4          |
| HB-BELL      | 53         |
| HB-HD-ZIP    | 47         |
| HB-KNOX      | 4          |
| HB-other     | 17         |
| HB-PHD       | 4          |
| HB-WOX       | 2          |
| HRT          | 2          |
| HSF          | 26         |
| LIM          | 6          |
| LOB          | 5          |
| MADS-M-type  | 4          |
| MADS-MIKC    | 12         |
| MYB          | 58         |
| MYB-related  | 146        |

|           |     |
|-----------|-----|
| NAC       | 101 |
| NF-X1     | 1   |
| NF-YA     | 31  |
| NF-YB     | 8   |
| NF-YC     | 11  |
| OFP       | 4   |
| PLATZ     | 7   |
| RWP-RK    | 25  |
| S1Fa-like | 3   |
| SBP       | 19  |
| SRS       | 1   |
| STAT      | 2   |
| TCP       | 12  |
| Tify      | 25  |
| Trihelix  | 25  |
| TUB       | 23  |
| ULT       | 1   |
| VOZ       | 5   |
| Whirly    | 5   |
| WRKY      | 54  |
| zf-HD     | 6   |

---
